# Supplementary material for: Outcomes of hospitalized patients with COVID-19 according to level of frailty
Source: PubMed Central journal article supplement (PMC8051355; doi:10.7717/peerj.11260), 2021-04-13
Supplement: peerj-09-11260-s001.pdf [file peerj-09-11260-s001.pdf]

## CODE BOOK

### ICU. Intensive Care Unit

0 = Not  
1 = Yes

CFS res

### CFS. Score. Clinical Frailty Score

1 = Frail  
2 = Pre-Frail  
3 = Robust.

### CFS. Classification. Clinical Frailty Score

3 = Frail  
4 = Pre-Frail  
5 = Robust

### Age

Value in years.

### Sex

1 = Man  
2 = Woman

### Health Care (Provider)

1 = Not  
2 = Yes

### Postal Code

Number of Postal Code

### Overcrowding

0 = Not  
1 = Yes

**Living Positive Covid**

0 = Not

1= Yes

**Country Born**

Country Born

**Functional Sate**

1 = Independent

2 = Semi-Dependent

3= Dependent

**Nosocomial Transmission**

0 = Not

1= Yes

**Center of Admission**

HULP: Hospital La Paz

CIII: Hospital Carlos III

CANT: Hospital Cantoblanco

Days Admission

**Floor**

Floor of Admission.

**Readmission**

0 = Not

1= Yes

**Cardiovascular Diseases**

0 = Not

1= Yes

**Hypertension**

0 = Not

1= Yes

**COPD**

0 = Not

1 = yes

**Oxygen at Home**

0=Not

1 = yes

**Asthma**

0 = Not

1= Yes

**Kidney Disease**

0=Not

1 = yes

**GLOMERULAR FILTERING 30**

0=Not

1 = yes

**Liver Disease Acuate**

0=Not

1 = yes

**Liver Disease Mild**

0=Not

1 = yes

**Neoplasm Malignant**

0=Not

1 = yes

**AIDS**

0=Not  
1 = yes

**Obesity**

0=Not  
1 = yes

**Diabetes**

0=Not  
1 = yes

**Diabetes without Complications**

0=Not  
1 = yes

**Rheumatological Diseases**

0=Not  
1 = yes

**Dementia**

0=Not  
1 = yes

**Malnutrition**

0=Not  
1 = yes

**Dyslipemia**

0=Not  
1 = yes

**Mental Problem Commun**

0=Not  
1 = yes

**Mental Problem Acuate 1-2**

0=Not  
1 = yes

**Pregnancy**

0=Not  
1 = yes

**Post Pregnancy**

0=Not  
1 = yes

**Smoker**

0=Not  
1 = yes

**Smoker Habits**

0=Not  
1 = yes

**Tobacco packs year**

Value

**Psoriasis**

0=Not  
1 = yes

**Dermatitis**

0=Not  
1 = yes

**Hydradenitis**

0=Not  
1 = yes

**Trips**

0=Not  
1 = yes

**Trips in Spain**

0=Not  
1 = yes

**Risks Factors**

0=Not  
1 = Yes

**Special Risk Factors**

Description

**Charson Comorbidity index**

Value in the scale

**Date Begging Sintoms**

Date

**Date Arriving Emergency**

Date

**Date Discharge**

Date

**Date Hospitalization**

Date

**Oxigenotherapy**

0=Not  
1 = Yes

**Prone**

0=Not  
1 = Yes

**Peep**

0=Not  
1 = Yes

**IPAP**

0=Not  
1 = Yes

**Respiratory Frequency**

Value

**Need to admission Intensive Care**

0=Not  
1 = Yes

**Arrangement Beds**

0=Not  
1 = Yes

**Readmission Intensive Care**

0=Not  
1 = Yes

**Exitus**

0=Not  
1 = Yes

**Date Exitus**

Date

**Disease Not Complicate**

0=Not  
1 = Yes

**Mild Pneumonia**

0=Not  
1 = Yes

**Acuate Pneumonia**

0=Not  
1 = Yes

**Respiratory Distress**

0=Not  
1 = Yes

**Sepsis**

0=Not  
1 = Yes

**Septic Shock**

0=Not  
1 = Yes

**Fever**

0=Not  
1 = Yes

**Myalgia**

0=Not  
1 = Yes

**Discomfort**

0=Not  
1 = Yes



**Myalgia**

0=Not  
1 = Yes

**Rhinorrhea**

0=Not  
1 = Yes

**Dysgeusia**

0=Not  
1 = Yes

**Anosmia**

0=Not  
1 = Yes

**Cough**

0=Not  
1 = Yes

**Productive Cough**

0=Not  
1 = Yes

**Odynofagia**

0=Not  
1 = Yes

**Pain Chest**

0=Not  
1 = Yes

**Pain Rib**

0=Not  
1 = Yes

**Hemoptysis**

0=Not  
1 = Yes

**Dyspnea**

0=Not  
1 = Yes

**Pain Abdominal**

0=Not  
1 = Yes

**Diarrhea**

0=Not  
1 = Yes

**Sickness**

0=Not  
1 = Yes

**Vomits**

0=Not  
1 = Yes

**High Level Awareness**

0=Not  
1 = Yes

**Behaviors**

0=Not  
1 = Yes

**Convulsion**

0=Not  
1 = Yes

**Infection Admission**

0=Not  
1 = Yes

**Microorganism Laboratory**

0=Not  
1 = Yes

**Microorganism Name**

Name

**Pneumonia Bacteria**

0=Not  
1 = Yes

**ARDS**

0=Not  
1 = Yes

**Pneumothorax**

0=Not  
1 = Yes

**Disease Pleural**

0=Not  
1 = Yes

**Meningitis**

0=Not  
1 = Yes

**Convulsion (Status)**

0=Not  
1 = Yes

**Stroke**

0=Not  
1 = Yes

**Heart Failure**

0=Not  
1 = Yes

**Myocarditis**

0=Not  
1 = Yes

**Pericarditis**

0=Not  
1 = Yes

**Endocarditis**

0=Not  
1 = Yes

**Arrythmia**

0=Not  
1 = Yes

**Cardiac Arrest**

0=Not  
1 = Yes

**Cardiac Arrest by VF**

0=Not  
1 = Yes

**Alteration Coagulation**

0=Not  
1 = Yes

**Anemia Subsidiary**

0=Not  
1 = Yes

**Rhabdomyolysis**

0=Not  
1 = Yes

**Digestive Bleeding**

0=Not  
1 = Yes

**Pancreatitis**

0=Not  
1 = Yes

**Liver Failure**

0=Not  
1 = Yes

**Accuate Confusional Syndrome**

0=Not  
1 = Yes

**Psyquiatrics Complications**

0=Not  
1 = Yes

**Drugs Reactions Mild**

0=Not  
1 = Yes

**Drugs Reactions Acuate**

0=Not  
1 = Yes

**Drug Reaction**

0=Not  
1 = Yes

**Number Confirmed PCR**

Number of PCR

**Date PCR Negative**

Date

**Evolution Complete**

0=Not  
1 = Mild  
2 = Yes

**Scale Cursg 65**

Valor Corresponding in the scale.

**Scale Fine 65**

Valor Corresponding in the scale.

**Scale Qsofa 65**

Valor Corresponding in the scale.

**Scale SOFA 65**

Valor Corresponding in the scale.

PSI

**Scale Cursg 65**

Valor Corresponding in the scale.

**Diseases Neurological**

0=Not  
1 = Yes

**Diseases Cardiological**

0=Not  
1 = Yes

**Diseases Hematological**

0=Not  
1 = Yes

**Diseases Hematological**

0=Not  
1 = Yes

**Diseases Digestive**

0=Not  
1 = Yes

**Diseases Neuro-Psychiatric**

0=Not  
1 = Yes

**Compilations Infections**

0=Not  
1 = Yes

**Inflammatory Diseases**

0=Not  
1 = Yes
